# Supplementary material for: Reliability and utility of blood glucose levels in the periodontal pockets of patients with type 2 diabetes mellitus: a cross-sectional study
Source: PeerJ. 2024 Nov 6;12:e18239. doi: 10.7717/peerj.18239 (PMC11549906; doi:10.7717/peerj.18239)
Supplement: Supplemental Information 1 [file peerj-12-18239-s001.xlsx]

## Sheet: Supplemental Data S1
ID for case-control matching	Type 2 diabetes mellitus	Type 2 diabetes mellitus category number	Time of blood collection	Postprandial time (minutes)	Age	Sex	Sex category number	Smoker	Smoking category number	HbA1c (%)	Tooth number of the sampled site (FDI Two-Digit system)	GBG (mg/dl)	FTBG (mg/dl)	Difference between GBG and FTBG (mg/dl)	PPD of the sampled site (mm)	BOP-positive sampled site category number	Number of teeth present	PISA (mm²)	PESA (mm²)	BOP (%)	Number of teeth with PPD of ≥6 mm	Number of teeth with tooth mobility >2°	PCR (%)	Periodontitis extent	Extent of periodontitis category number	Periodontitis with molar/incisor pattern (ex-aggressive periodontitis)	Mean PPD (mm)	Periodontitis stage	Periodontitis grade	Periodontitis grade category number	Number of teeth with PPD >4 mm (%)	Number of teeth with PPD >5 mm (%)	Number of teeth with PPD >6 mm (%)	Participants with sample site of PPD ≥4 mm category number	Mean of GBG and FTBG (mm²)	Participants with GBG higher than FTBG category number
1	No	0	13:30:00	360	79	F	0	No	0	Not applicable	26	83	103	-20	3	1	28	368.4	1119.8	31.5	0	0	18.8	Localized	0	No	2.071	2	A	0	3.57	0	0	1	93	1
2	No	0	09:50:00	140	62	F	0	No	0	Not applicable	44	121	143	-22	2	1	24	241.4	814.4	20.1	1	0	13	Localized	0	No	1.799	3	A	0	4.17	4.17	4.17	1	132	1
3	No	0	14:20:00	140	69	M	1	No	0	Not applicable	46	126	156	-30	2	1	19	103.3	716.4	14	0	0	25	Localized	0	No	3.917	2	A	0	0	0	0	1	141	1
5	No	0	18:00:00	360	54	F	0	Yes	1	Not applicable	25	99	97	2	2	1	28	477.5	1234.1	30.4	0	0	56.3	Localized	0	No	2.256	3	B	1	14.3	7.14	0	1	98	2
6	No	0	11:00:00	240	80	M	1	No	0	Not applicable	11	107	102	5	3	1	26	69.5	1134.6	4.49	1	0	31.2	Localized	0	No	2.295	3	A	0	15.4	3.85	3.85	1	104.5	2
8	No	0	11:49:00	169	63	M	1	No	0	Not applicable	48	86	102	-16	3	1	25	9.4	873.8	3	0	0	19	Generalized	1	No	1.806	4	B	1	0	0	0	1	94	1
9	No	0	15:45:00	300	48	M	1	No	0	Not applicable	23	44	91	-47	4	1	26	142	1208.9	10.2	0	0	39.4	Generalized	1	No	2.391	2	A	0	26.9	0	0	2	67.5	1
11	No	0	09:20:00	200	62	F	0	No	0	Not applicable	47	56	89	-33	3	1	23	27.1	847.5	2.8	0	0	15.2	Generalized	1	No	2.042	4	B	1	12.5	0	0	1	72.5	1
13	No	0	12:00:00	60	70	M	1	No	0	Not applicable	27	101	104	-3	3	1	14	21	602.2	2.3	0	0	35.4	Generalized	1	No	2.024	4	C	2	35.7	14.3	14.3	1	102.5	1
14	No	0	17:15:00	240	68	F	0	No	0	Not applicable	44	112	112	0	3	1	25	140.6	741.6	14.6	0	0	41.7	Localized	0	No	1.607	1	A	0	0	0	0	1	112	1
15	No	0	15:10:00	100	68	M	1	No	0	Not applicable	13	118	129	-11	3	1	23	760	1521.2	51.4	5	6	34	Generalized	1	No	3.232	3	B	1	52.1	39.1	26.1	1	123.5	1
16	No	0	10:00:00	180	71	M	1	No	0	Not applicable	32	67	103	-36	10	1	24	1949.7	2997.4	64.5	21	7	68.8	Generalized	1	No	5.181	3	B	1	100	95.8	87.5	2	85	1
17	No	0	16:00:00	210	58	F	0	No	0	Not applicable	24	81	106	-25	5	1	28	126.1	1198.2	4.17	0	0	24.1	Generalized	1	No	2.286	2	A	0	17.9	7.14	0	2	93.5	1
19	No	0	09:30:00	120	71	M	1	No	0	Not applicable	14	123	121	2	4	1	22	135.8	867.8	12.5	0	0	11.3	Generalized	1	No	2.16	3	B	1	22.7	0	0	2	122	2
22	No	0	15:40:00	220	79	F	0	No	0	Not applicable	13	106	105	1	4	1	20	449.2	969.5	36.6	1	0	35	Generalized	1	No	2.63	3	A	0	25	10	5	2	105.5	2
23	Yes	1	10:45:00	225	54	M	1	No	0	9.1	24	146	154	-8	3	1	20	761.1	1094.2	67.5	0	0	58.6	Localized	0	No	2.883	2	C	2	25	0	0	1	150	1
24	Yes	1	11:20:00	65	64	F	0	No	0	6.8	23	272	225	47	8	1	22	434.6	1299.3	27.2	3	0	22	Generalized	1	No	2.886	3	B	1	45.5	27.3	9.09	2	248.5	2
25	Yes	1	14:00:00	180	75	F	0	No	0	7	36	158	216	-58	4	1	19	134.7	1059.2	10.5	3	0	30	Generalized	1	No	2.754	2	C	2	52.6	21.1	5.26	2	187	1
26	Yes	1	10:30:00	180	68	M	1	No	0	6.6	26	139	153	-14	4	1	25	2721.3	2721.3	54	17	22	55	Generalized	1	No	5.047	3	B	1	100	88	68	2	146	1
27	Yes	1	12:10:00	280	79	M	1	No	0	6.9	14	129	195	-66	4	1	23	56.6	903.3	7.25	0	2	40.2	Generalized	1	No	2.333	2	B	1	8.7	0	0	2	162	1
28	Yes	1	14:30:00	120	69	M	1	No	0	6	36	169	194	-25	5	1	23	48.6	860.5	5.1	0	0	20.6	Generalized	1	No	2.05	3	B	1	13	4.35	0	2	181.5	1
29	Yes	1	15:20:00	140	71	F	0	No	0	6	27	154	139	15	6	1	18	100.5	847.4	7.4	0	0	8.3	Generalized	1	No	2.33	3	B	1	5.56	0	0	2	146.5	2
30	Yes	1	13:50:00	90	62	F	0	Yes	1	6.7	22	135	162	-27	4	1	9	13.1	308.4	3.7	0	0	33.3	Generalized	1	No	1.91	3	B	1	11.1	0	0	2	148.5	1
31	Yes	1	10:35:00	155	68	M	1	No	0	6.4	12	133	104	29	7	1	17	1766.8	1970.5	88.2	15	4	69.1	Generalized	1	No	5.99	4	B	1	100	94.1	88.2	2	118.5	2
32	Yes	1	12:00:00	270	66	F	0	No	0	6.3	45	90	89	1	4	1	21	214.5	843	24.6	0	1	58.3	Generalized	1	No	2.159	3	B	1	4.76	4.76	0	2	89.5	2
33	Yes	1	15:15:00	220	85	M	1	No	0	7	17	199	232	-33	5	1	26	504.4	1256.9	37.9	0	0	39.4	Generalized	1	No	2.468	3	C	2	15.3	7.69	0	2	215.5	1
34	Yes	1	10:50:00	170	56	M	1	Yes	1	7.1	23	113	106	7	6	1	20	384.9	957.2	41.7	4	0	42.5	Generalized	1	No	2.733	3	C	2	20	20	20	2	109.5	2
35	Yes	1	15:15:00	120	64	M	1	Yes	1	5.8	45	66	95	-29	4	1	15	175.2	850.7	46.7	0	0	21.7	Generalized	1	No	2.833	2	B	1	33.333	0	0	2	80.5	1
36	Yes	1	10:30:00	210	74	F	0	No	0	7.5	23	124	161	-37	3	1	14	17.7	531.6	21.4	0	0	21.4	Generalized	1	No	2.226	2	C	2	7.1429	0	0	1	142.5	1
37	Yes	1	11:45:00	195	56	F	0	No	0	7.7	36	143	216	-73	3	1	27	282.1	984.1	24.6	0	0	45.4	Generalized	1	No	1.926	2	C	2	0	0	0	1	179.5	1
